# Supplementary material for: Roads and bats: a meta‐analysis and review of the evidence on vehicle collisions and barrier effects
Source: PubMed Central journal article supplement (PMC5031215; doi:10.1111/mam.12072), 2016-05-29
Supplement: MAM-46-311-s001.pdf [file MAM-46-311-s001.pdf]

## Supplementary Information

**Appendix S1.** The flight height category to which each reported species included in the meta-analysis was assigned.

| Taxon                            | Flight height |
|----------------------------------|---------------|
| <i>Rhinolophus blasii</i>        | Low           |
| <i>Rhinolophus ferrumequinum</i> | Low           |
| <i>Rhinolophus hipposideros</i>  | Low           |
| <i>Eptesicus nilsonii</i>        | High          |
| <i>Eptesicus serotinus</i>       | High          |
| <i>Nyctalus leisleri</i>         | High          |
| <i>Nyctalus noctula</i>          | High          |
| <i>Pipistrellus kuhlii</i>       | Low           |
| <i>Pipistrellus nathusii</i>     | Low           |
| <i>Pipistrellus pipistrellus</i> | Low           |
| <i>Pipistrellus pygmaeus</i>     | Low           |
| <i>Pipistrellus savii</i>        | Low           |
| <i>Pipistrellus</i> spp.         | Low           |
| <i>Barbastella barbastellus</i>  | Low           |
| <i>Plecotus auritus</i>          | Low           |
| <i>Plecotus austriacus</i>       | Low           |
| <i>Plecotus</i> spp.             | Low           |
| <i>Vespertilio murinus</i>       | High          |
| <i>Myotis alcaethoe</i>          | Low           |
| <i>Myotis bechsteinii</i>        | Low           |
| <i>Myotis brandtii</i>           | Low           |
| <i>Myotis capaccinii</i>         | Low           |
| <i>Myotis dasycneme</i>          | Low           |
| <i>Myotis daubentonii</i>        | Low           |
| <i>Myotis emarginatus</i>        | Low           |
| <i>Myotis escalerae</i>          | Low           |
| <i>Myotis lucifugus</i>          | Low           |
| <i>Myotis myotis</i>             | Low           |
| <i>Myotis mysticanus</i>         | Low           |
| <i>Myotis nattereri</i>          | Low           |
| <i>Myotis sodalis</i>            | Low           |
| <i>Miniopterus schreibersii</i>  | Low           |
| <i>Myotis</i> spp.               | Low           |

**Appendix S2.** The total number of casualties reported by each country. The number in brackets refers to the total number of studies conducted in that country.

| Country | Total casualties | Combined length of | Total survey time | Casualties/km | Casualties/km/month |
|---------|------------------|--------------------|-------------------|---------------|---------------------|
|---------|------------------|--------------------|-------------------|---------------|---------------------|

|                    |     | roads surveyed (km) | (months) |       |      |
|--------------------|-----|---------------------|----------|-------|------|
| Czech Republic (1) | 119 | 8                   | 6        | 14.8  | 2.4  |
| France (1)         | 104 | 2                   | 24       | 52    | 2.1  |
| Germany (3)        | 464 |                     |          |       |      |
| Montenegro (1)     | 17  | 30                  | 14.5     | 0.5   | 0.03 |
| Poland (3)         | 225 | 25.6                |          | 8.7   | 1.4  |
| Portugal (1)       | 154 | 51                  | 3        | 3.    | 1    |
| Spain (1)          | 72  | 17                  | 12       | 4.2   | 0.3  |
| USA (1)            | 29  | 0.1                 | 3        | 193.3 | 64.4 |

**Appendix S3.** Site characteristics as reported by authors. This data was not available for three studies (Rackow et al. 1994, Kiefer et al. 1995, Haensel & Rackow, 1996) and so they have not been included.

| Reference                              | Number of roads | Road length                                        | Road width                                     | Traffic volume                                                                                         | Lit/unlit                                   | Surrounding habitat type                                             |
|----------------------------------------|-----------------|----------------------------------------------------|------------------------------------------------|--------------------------------------------------------------------------------------------------------|---------------------------------------------|----------------------------------------------------------------------|
| Capo et al. 2006 (France)              | 1               | Not reported                                       | Not reported                                   | Not reported                                                                                           | Partly lit                                  | Sparse vegetation, hedgerow and isolated trees.                      |
| Gaisler et al. 2009 (Czech Republic)   | 2               | 3.5 km and 4.5 km                                  | Four lane                                      | Not reported                                                                                           | Not reported                                | One road had a lake on either side, the other crossed over a stream. |
| Gonzalez-Prieto et al. 1993 (Spain)    | 1               | 17 km                                              | Two lanes (10 m wide including hard shoulders) | Not reported                                                                                           | Not reported                                | Trees, vineyards and shrubland.                                      |
| Iković et al. 2014 (Montenegro)        | 2               | 20 km high-traffic road and 10 km low-traffic road | Not reported                                   | One high-traffic road with 10300 vehicles per day and one low-traffic road with 1100 vehicles per day. | One of the monitored sites had streetlights | Meadows, wetlands and Mediterranean karst scrub.                     |
| Lesiński 2007 <i>Method 1</i> (Poland) | 1               | 8 km                                               | Two lanes                                      | Heavy traffic                                                                                          | Not reported                                | Not reported                                                         |
| Lesiński 2007 <i>Method 2</i> (Poland) | Several         | NA                                                 | Not reported                                   | Not reported                                                                                           | NA                                          | Not reported                                                         |
| Lesiński 2008 (Poland)                 | 1               | 1 km                                               | Four lanes                                     | “heavy and round the clock”                                                                            | Not reported                                | Allotment gardens on one side and open area on the other, urban      |



**Appendix S5.** Sensitivity analysis for flight height (excluding Pipistrellus).

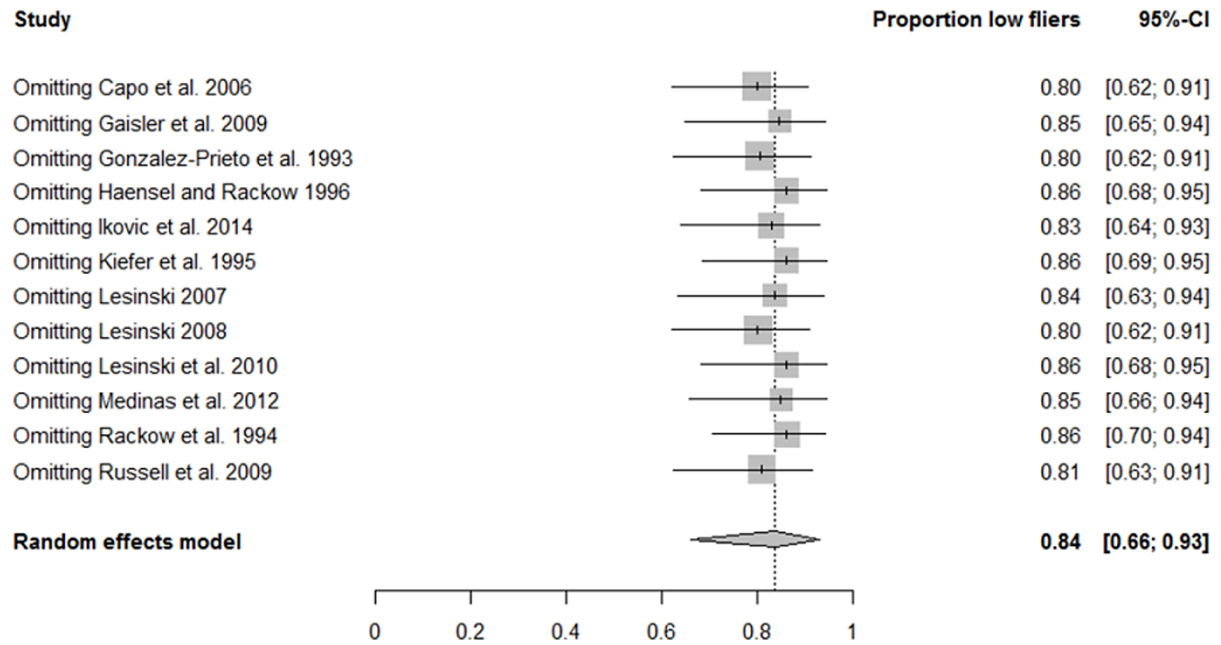

**Appendix S6.** Sensitivity analysis for flight height (including Pipistrellus).

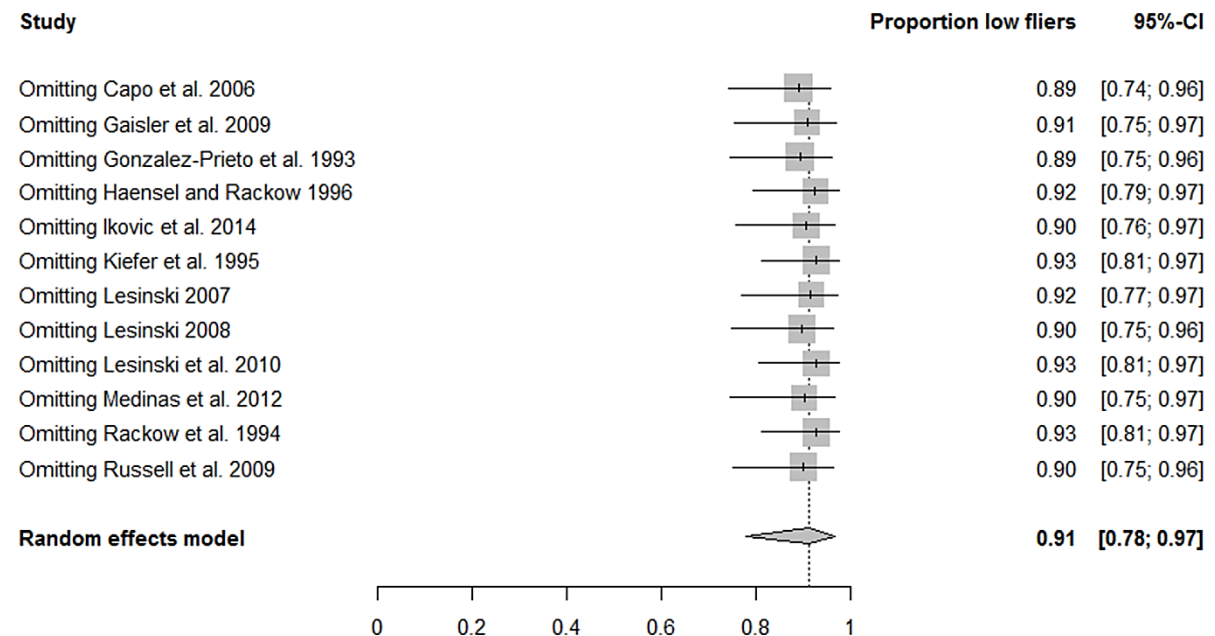

**Appendix S7.** Sensitivity analysis for sex bias.

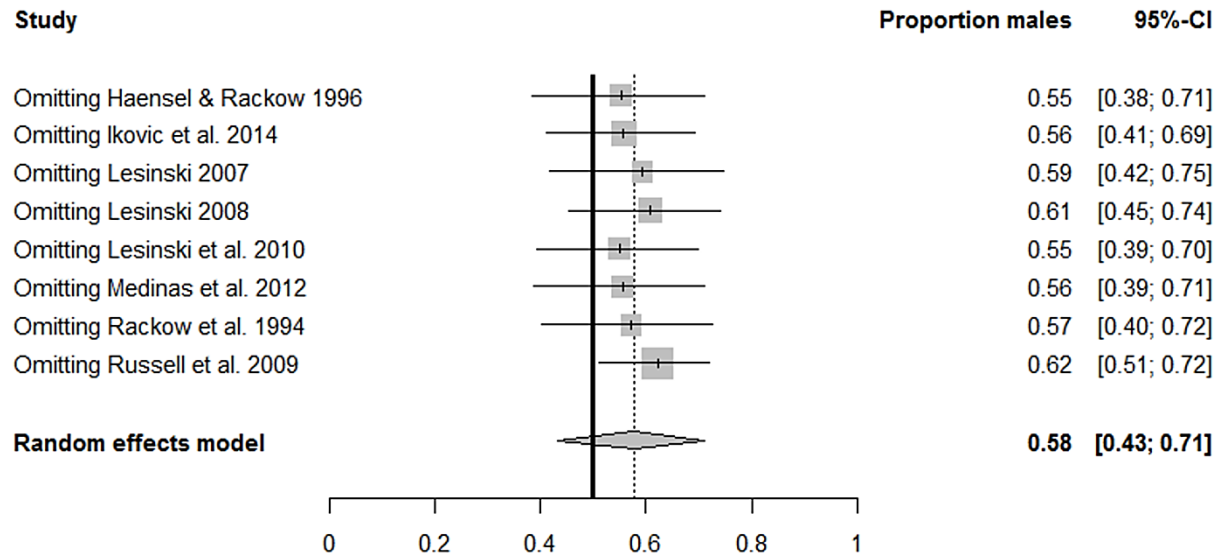

**Appendix S8.** Sensitivity analysis for age.

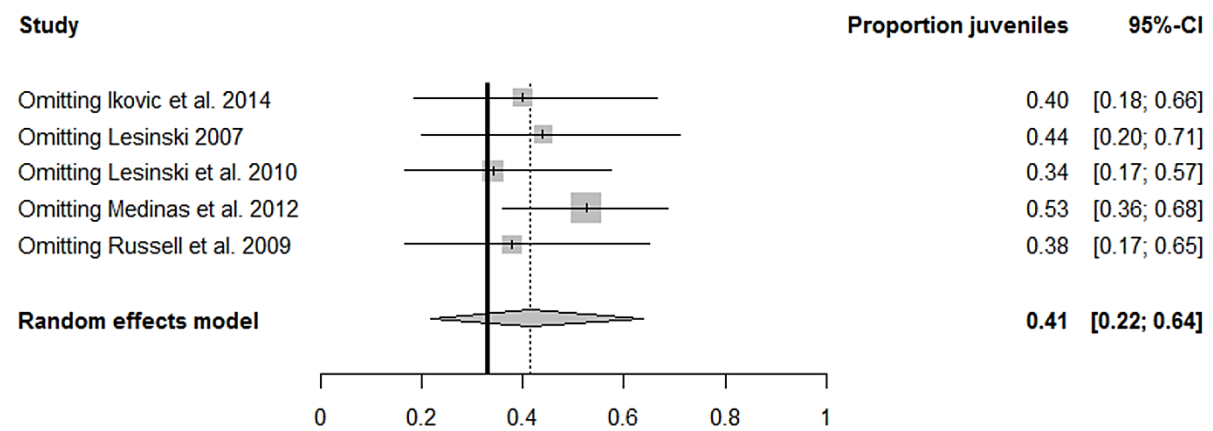

**Appendix S9.** Results reported by Bennett & Zurcher (2013) of the number of bats crossing in the presence and absence of vehicles and the height at which they were observed crossing.

| Vehicles | Height (m) | Crossing     |
|----------|------------|--------------|
| Absent   | <7.5       | 37% (3/8)    |
| Absent   | >7.5<14    | 91% (43/47)  |
| Absent   | >14        | 100% (31/31) |
| Present  | <9         | 57% (8/14)   |
| Present  | >9<13      | 72% (8/11)   |
| Present  | >13        | 90% (9/10)   |

**Appendix S10.** Results reported by Bennett & Zurcher (2013) of the number of bats crossing in the presence and absence of vehicles and the presence or absence of a tree layer.

| <b>Vehicles</b> | <b>Tree layer</b> | <b>Crossing</b> |
|-----------------|-------------------|-----------------|
| Present         | Absent            | 3.45% (2/58)    |
| Present         | Present           | 58.62% (34/58)  |
| Absent          | Absent            | 14% (8/57)      |
| Absent          | Present           | 79% (81/102)    |
